# Supplementary material for: Partnered Excited-State Intermolecular Proton Transfer Fluorescence (P-ESIPT) Signaling for Nitrate Sensing and High-Resolution Cell-Imaging
Source: MDPI journal article supplement (doi:10.3390/molecules27165164), 2022-08-13
Supplement: s1 [file s1]

---

*Supporting Information for*

**Partnered excited-state intermolecular proton transfer fluorescence (P-ESIPT) signaling for nitrate sensing and high resolution cell-imaging**

Pan Ma, Fuchun Gong,\* Hanming Zhu, You Qian, Lingzhi He, Jiaoyun Xia, Zhong Cao

College of Chemistry and Chemical Engineering, Changsha University of Science and Technology, Changsha, 410114, P. R. China

---

\*Corresponding authors

Tel: +86-0731-85258733;

E-mail addresses: gongfc139@163.com (F.-C. Gong)

## Table of contents

|                                                            |            |
|------------------------------------------------------------|------------|
| <b>1. Characterization of ESIPT-F.....</b>                 | <b>2-4</b> |
| <b>2. Determination of fluorescence quantum yield.....</b> | <b>5</b>   |
| <b>3. MTT assays of ESIPT-F.....</b>                       | <b>6</b>   |

## 1. Characterization of ESIPT-F

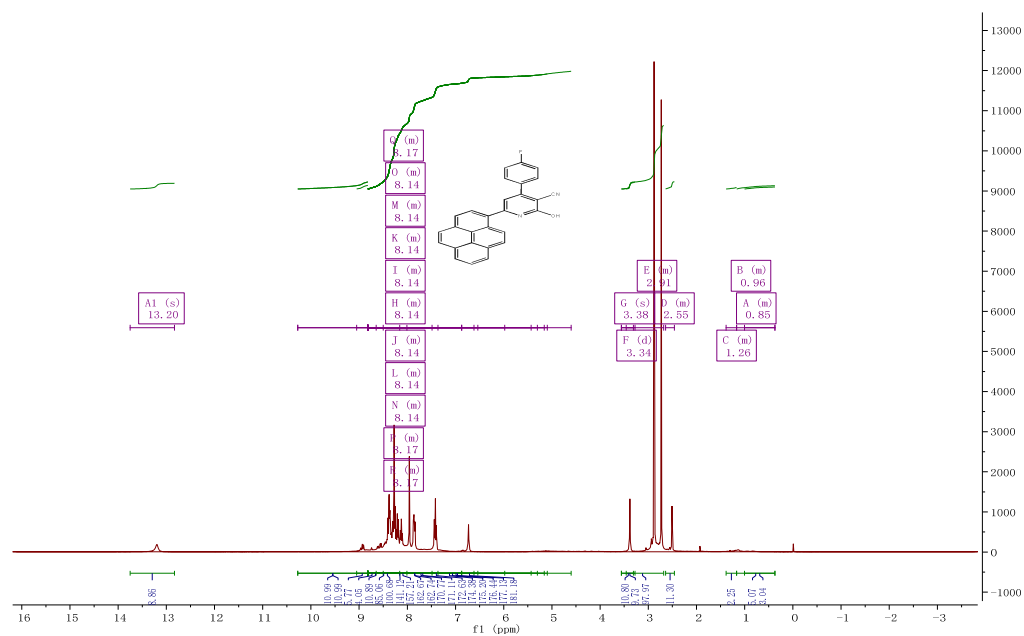**Fig.S1**  $^1\text{H}$ NMR of ESIPT-F

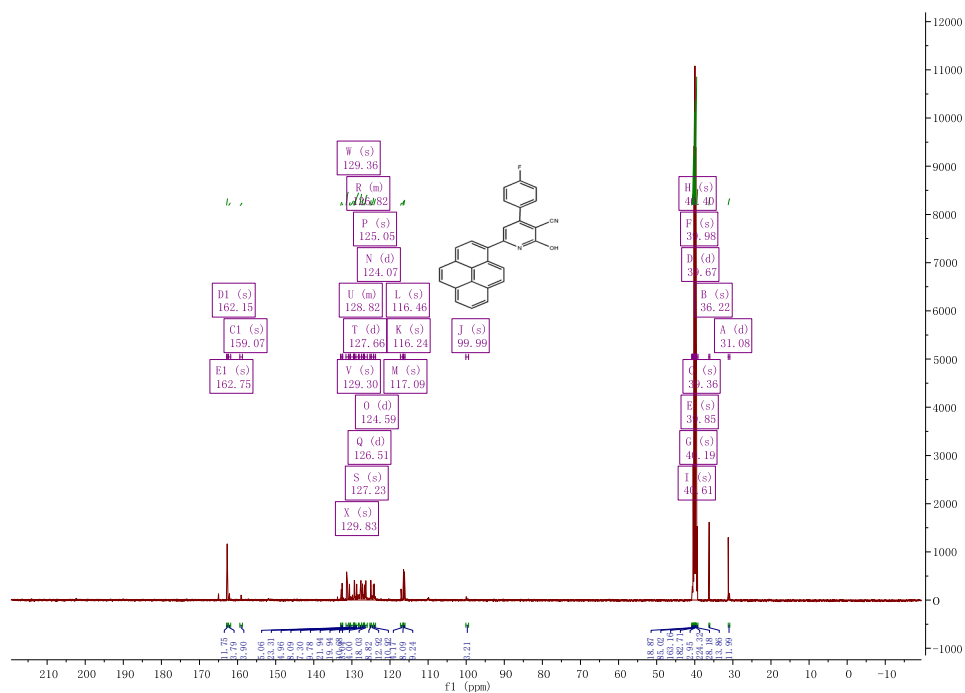**Fig.S2**  $^{13}\text{C}$ NMR of ESIPT-F

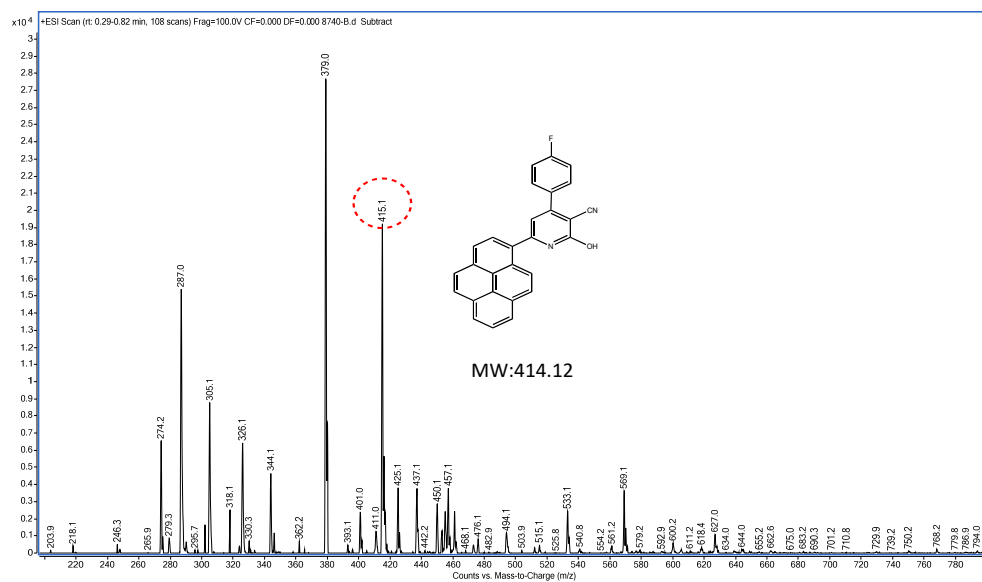

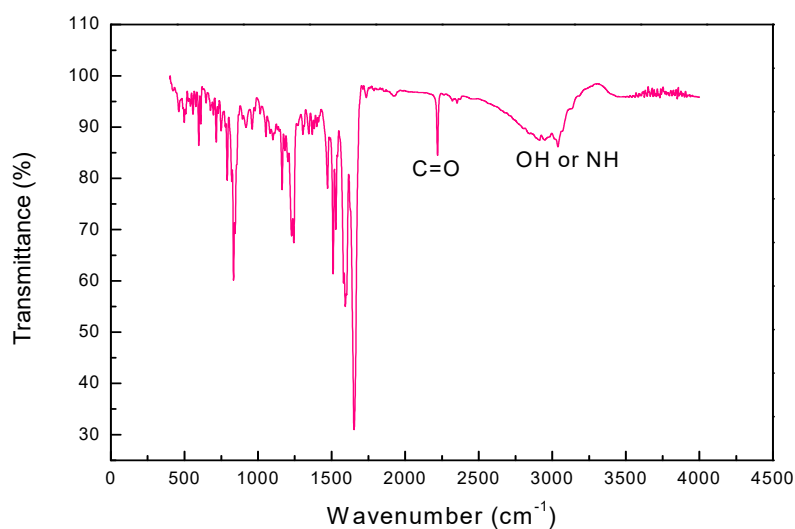

**Fig.S4** FT-IR of ESIPT-F

## 2. Determination of fluorescence quantum yield

The fluorescence quantum yield (FQY) were determined using quinine sulfate (FQY=0.54 at 360 nm) in sulfuric acid (0.10 mol.L<sup>-1</sup>,  $\eta$  =1.33) as the standard substance. The absolute FQY values were calculated corresponding to the following equation:

$$\Phi_u = \Phi_s (I_u/I_s) (A_s/A_u) (\eta_u^2/\eta_s^2)$$

$\Phi$  is fluorescence quantum yield;  $I$  is the measured integrated fluorescence intensity;  $A$  is the optical density measured at the selected excitation wavelength;  $\eta$  is the refractive index. The subscript “s” refers to the standard FQY of the reference quinine sulfate. The subscript “u” refers to the unknown FQY of the fluorescent PNPs. In order to minimize re-absorption effect, absorbance in the 1.0 cm fluorescence cuvette was kept under 0.1 at the excitation wavelength of 360 nm.

## 3. MTT assays of ESIPT-F

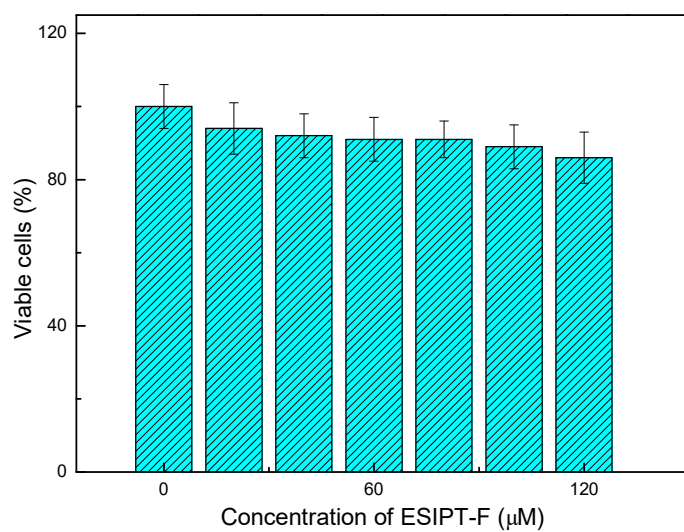

**Fig.S5** Denotes% cell viability of HEC-1-A cells treated with different concentrations (0-120  $\mu$ M) of ESIPT-F for 12 h determined by MTT assay. Results are expressed as mean  $\pm$  S.D. of three independent experiments.
